# Supplementary material
Source: publisher figshare collection journal article supplement (https://acs.figshare.com/ndownloader/files/4737547)
Supplement: Supplementary file 1 [file 4737547]

 
data_03MMD205 
 
_audit_creation_method            SHELXL-97 
_chemical_name_systematic 
; 
trans-Dichloro-bis(2,5-difluoroaniline-N)-palladium(ii) 
; 
_chemical_name_common             ? 
_chemical_melting_point           ? 
_chemical_formula_moiety          ? 
_chemical_formula_sum 
 'C12 H10 Cl2 F4 N2 Pd' 
_chemical_formula_weight          435.52 
 
loop_ 
 _atom_type_symbol 
 _atom_type_description 
 _atom_type_scat_dispersion_real 
 _atom_type_scat_dispersion_imag 
 _atom_type_scat_source 
 'C'  'C'   0.0033   0.0016 
 'International Tables Vol C Tables 4.2.6.8 and 6.1.1.4' 
 'H'  'H'   0.0000   0.0000 
 'International Tables Vol C Tables 4.2.6.8 and 6.1.1.4' 
 'N'  'N'   0.0061   0.0033 
 'International Tables Vol C Tables 4.2.6.8 and 6.1.1.4' 
 'F'  'F'   0.0171   0.0103 
 'International Tables Vol C Tables 4.2.6.8 and 6.1.1.4' 
 'Cl'  'Cl'   0.1484   0.1585 
 'International Tables Vol C Tables 4.2.6.8 and 6.1.1.4' 
 'Pd'  'Pd'  -0.9988   1.0072 
 'International Tables Vol C Tables 4.2.6.8 and 6.1.1.4' 
 
_symmetry_cell_setting           'Monoclinic'
_symmetry_space_group_name_H-M   'P 21/c' 
 
loop_ 
 _symmetry_equiv_pos_as_xyz 
 'x, y, z' 
 '-x, y+1/2, -z+1/2' 
 '-x, -y, -z' 
 'x, -y-1/2, z-1/2' 
 
_cell_length_a                    13.800(1) 
_cell_length_b                    6.187(1) 
_cell_length_c                    8.582(1) 
_cell_angle_alpha                 90.00 
_cell_angle_beta                  97.225(2) 
_cell_angle_gamma                 90.00 
_cell_volume                      726.9(2) 
_cell_formula_units_Z             2 
_cell_measurement_temperature     293(2)
_cell_measurement_reflns_used     4361
_cell_measurement_theta_min        2.98
_cell_measurement_theta_max       32.41 
 
_exptl_crystal_description        'plates'
_exptl_crystal_colour             'orange'
_exptl_crystal_size_min           0.058
_exptl_crystal_size_mid           0.156
_exptl_crystal_size_max           0.324 
_exptl_crystal_density_meas       ? 
_exptl_crystal_density_diffrn     1.990 
_exptl_crystal_density_method     'not measured' 
_exptl_crystal_F_000              424 
_exptl_absorpt_coefficient_mu     1.680 
_exptl_absorpt_correction_type    'analytical:face-indexed'
_exptl_absorpt_correction_T_min   0.6649
_exptl_absorpt_correction_T_max   0.9088 
_exptl_absorpt_process_details    ? 
 
_exptl_special_details 
; 
 ? 
; 
 
_diffrn_ambient_temperature       293(2) 
_diffrn_radiation_wavelength      0.71073 
_diffrn_radiation_type            MoK\a 
_diffrn_radiation_source          'fine-focus sealed tube' 
_diffrn_radiation_monochromator   graphite 
_diffrn_measurement_device_type   'Bruker Smart Apex CCD diffractometer' 
_diffrn_measurement_method        '\w-scans'
_diffrn_detector_area_resol_mean  0.661 
_diffrn_standards_number          ? 
_diffrn_standards_interval_count  ? 
_diffrn_standards_interval_time   ? 
_diffrn_standards_decay_%         0 
_diffrn_reflns_number             9550 
_diffrn_reflns_av_R_equivalents   0.0602 
_diffrn_reflns_av_sigmaI/netI     0.0535 
_diffrn_reflns_limit_h_min        -20 
_diffrn_reflns_limit_h_max        20 
_diffrn_reflns_limit_k_min        -9 
_diffrn_reflns_limit_k_max        9 
_diffrn_reflns_limit_l_min        -12 
_diffrn_reflns_limit_l_max        12 
_diffrn_reflns_theta_min          2.98 
_diffrn_reflns_theta_max          32.49 
_reflns_number_total              2611 
_reflns_number_gt                 1954 
_reflns_threshold_expression      >2sigma(I) 
 
_computing_data_collection        'SMART V 5.625'
_computing_cell_refinement        'SMART V 5.625'
_computing_data_reduction         'SAINT V 6.23C'
_computing_structure_solution     'SHELXTL V 6.10 (Sheldrick, 2000)' 
_computing_structure_refinement   'SHELXTL V 6.10 (Sheldrick, 2000)' 
_computing_molecular_graphics     'SHELXTL V 6.10 (Sheldrick, 2000)'
_computing_publication_material   'SHELXTL V 6.10 (Sheldrick, 2000)' 
 
_refine_special_details 
; 
 Refinement of F^2^ against ALL reflections.  The weighted R-factor wR and 
 goodness of fit S are based on F^2^, conventional R-factors R are based 
 on F, with F set to zero for negative F^2^. The threshold expression of 
 F^2^ > 2sigma(F^2^) is used only for calculating R-factors(gt) etc. and is 
 not relevant to the choice of reflections for refinement.  R-factors based 
 on F^2^ are statistically about twice as large as those based on F, and R- 
 factors based on ALL data will be even larger. 
; 
 
_refine_ls_structure_factor_coef  Fsqd  
_refine_ls_matrix_type            full 
_refine_ls_weighting_scheme       calc  
_refine_ls_weighting_details 
 'calc w=1/[\s^2^(Fo^2^)+(0.0230P)^2^] where P=(Fo^2^+2Fc^2^)/3' 
_atom_sites_solution_primary      direct 
_atom_sites_solution_secondary    difmap 
_atom_sites_solution_hydrogens    difmap 
_refine_ls_hydrogen_treatment     refall 
_refine_ls_extinction_method      none 
_refine_ls_extinction_coef        ? 
_refine_ls_number_reflns          2611 
_refine_ls_number_parameters      117 
_refine_ls_number_restraints      0 
_refine_ls_R_factor_all           0.0608 
_refine_ls_R_factor_gt            0.0382 
_refine_ls_wR_factor_ref          0.0718 
_refine_ls_wR_factor_gt           0.0662 
_refine_ls_goodness_of_fit_ref    0.986 
_refine_ls_restrained_S_all       0.986 
_refine_ls_shift/su_max           0.000 
_refine_ls_shift/su_mean          0.000 
 
loop_ 
 _atom_site_label 
 _atom_site_type_symbol 
 _atom_site_fract_x 
 _atom_site_fract_y 
 _atom_site_fract_z 
 _atom_site_U_iso_or_equiv 
 _atom_site_adp_type 
 _atom_site_occupancy 
 _atom_site_symmetry_multiplicity 
 _atom_site_calc_flag 
 _atom_site_refinement_flags 
 _atom_site_disorder_assembly 
 _atom_site_disorder_group 
Pd1 Pd 0.0000 0.0000 0.0000 0.03047(9) Uani 1 2 d S . . 
Cl1 Cl -0.08651(5) 0.06208(11) -0.24146(8) 0.03996(16) Uani 1 1 d . . . 
F1 F 0.19844(12) 0.3909(3) 0.0824(2) 0.0581(5) Uani 1 1 d . . . 
F2 F 0.42077(14) -0.3197(3) 0.0443(3) 0.0904(8) Uani 1 1 d . . . 
N1 N 0.12226(17) 0.0625(5) -0.1082(3) 0.0367(5) Uani 1 1 d . . . 
H1A H 0.1116(17) 0.174(4) -0.140(3) 0.026(8) Uiso 1 1 d . . . 
H1B H 0.117(2) -0.028(4) -0.178(4) 0.038(9) Uiso 1 1 d . . . 
C1 C 0.21845(18) 0.0486(4) -0.0243(3) 0.0354(6) Uani 1 1 d . . . 
C2 C 0.2552(2) 0.2139(5) 0.0736(3) 0.0432(7) Uani 1 1 d . . . 
C3 C 0.3445(2) 0.2032(6) 0.1616(4) 0.0578(9) Uani 1 1 d . . . 
H3 H 0.360(2) 0.313(5) 0.228(4) 0.057(9) Uiso 1 1 d . . . 
C4 C 0.4007(2) 0.0217(6) 0.1527(5) 0.0655(10) Uani 1 1 d . . . 
H4 H 0.455(3) 0.009(5) 0.207(5) 0.083(13) Uiso 1 1 d . . . 
C5 C 0.3652(2) -0.1413(5) 0.0540(4) 0.0578(9) Uani 1 1 d . . . 
C6 C 0.2757(2) -0.1330(5) -0.0337(4) 0.0466(7) Uani 1 1 d . . . 
H6 H 0.2528(18) -0.250(4) -0.095(3) 0.041(8) Uiso 1 1 d . . . 
 
loop_ 
 _atom_site_aniso_label 
 _atom_site_aniso_U_11 
 _atom_site_aniso_U_22 
 _atom_site_aniso_U_33 
 _atom_site_aniso_U_23 
 _atom_site_aniso_U_13 
 _atom_site_aniso_U_12 
Pd1 0.02849(13) 0.02832(13) 0.03220(14) 0.00192(11) -0.00553(9) -0.00050(11) 
Cl1 0.0386(3) 0.0414(3) 0.0363(3) 0.0058(3) -0.0094(3) -0.0017(3) 
F1 0.0635(12) 0.0483(10) 0.0610(12) -0.0113(9) 0.0019(9) 0.0006(9) 
F2 0.0566(12) 0.0790(15) 0.128(2) 0.0017(14) -0.0170(13) 0.0276(11) 
N1 0.0338(12) 0.0374(13) 0.0367(13) 0.0018(11) -0.0043(9) 0.0009(10) 
C1 0.0289(12) 0.0385(15) 0.0377(14) 0.0027(10) -0.0003(10) -0.0039(9) 
C2 0.0394(15) 0.0450(16) 0.0446(16) -0.0024(13) 0.0031(13) -0.0078(12) 
C3 0.0479(19) 0.070(2) 0.052(2) -0.0136(17) -0.0064(15) -0.0184(17) 
C4 0.0337(16) 0.084(3) 0.074(2) 0.004(2) -0.0147(16) -0.0078(18) 
C5 0.0353(16) 0.056(2) 0.079(2) 0.0069(18) -0.0043(16) 0.0048(14) 
C6 0.0393(16) 0.0408(16) 0.0568(19) 0.0007(14) -0.0050(14) -0.0023(12) 
 
_geom_special_details 
; 
 All esds (except the esd in the dihedral angle between two l.s. planes) 
 are estimated using the full covariance matrix.  The cell esds are taken 
 into account individually in the estimation of esds in distances, angles 
 and torsion angles; correlations between esds in cell parameters are only 
 used when they are defined by crystal symmetry.  An approximate (isotropic) 
 treatment of cell esds is used for estimating esds involving l.s. planes. 
; 
 
loop_ 
 _geom_bond_atom_site_label_1 
 _geom_bond_atom_site_label_2 
 _geom_bond_distance 
 _geom_bond_site_symmetry_2 
 _geom_bond_publ_flag 
Pd1 N1 2.062(2) 3 ? 
Pd1 N1 2.062(2) . ? 
Pd1 Cl1 2.2901(7) . ? 
Pd1 Cl1 2.2901(7) 3 ? 
Pd1 Cl1 3.7888(8) 2_544 ? 
Pd1 Cl1 3.7888(8) 4_566 ? 
F1 C2 1.354(3) . ? 
F2 C5 1.352(4) . ? 
N1 C1 1.431(3) . ? 
N1 H1A 0.75(3) . ? 
N1 H1B 0.82(3) . ? 
C1 C2 1.379(4) . ? 
C1 C6 1.382(4) . ? 
C2 C3 1.363(4) . ? 
C3 C4 1.373(5) . ? 
C3 H3 0.89(3) . ? 
C4 C5 1.368(5) . ? 
C4 H4 0.83(4) . ? 
C5 C6 1.364(4) . ? 
C6 H6 0.93(3) . ? 
 
loop_ 
 _geom_angle_atom_site_label_1 
 _geom_angle_atom_site_label_2 
 _geom_angle_atom_site_label_3 
 _geom_angle 
 _geom_angle_site_symmetry_1 
 _geom_angle_site_symmetry_3 
 _geom_angle_publ_flag 
N1 Pd1 N1 180.00(17) 3 . ? 
N1 Pd1 Cl1 94.36(7) 3 . ? 
N1 Pd1 Cl1 85.64(7) . . ? 
N1 Pd1 Cl1 85.64(7) 3 3 ? 
N1 Pd1 Cl1 94.36(7) . 3 ? 
Cl1 Pd1 Cl1 180.00(3) . 3 ? 
N1 Pd1 Cl1 117.74(8) 3 2_544 ? 
N1 Pd1 Cl1 62.26(8) . 2_544 ? 
Cl1 Pd1 Cl1 75.926(18) . 2_544 ? 
Cl1 Pd1 Cl1 104.074(18) 3 2_544 ? 
N1 Pd1 Cl1 62.26(8) 3 4_566 ? 
N1 Pd1 Cl1 117.74(8) . 4_566 ? 
Cl1 Pd1 Cl1 104.074(18) . 4_566 ? 
Cl1 Pd1 Cl1 75.926(18) 3 4_566 ? 
Cl1 Pd1 Cl1 180.00(3) 2_544 4_566 ? 
C1 N1 Pd1 121.47(18) . . ? 
C1 N1 H1A 111.5(19) . . ? 
Pd1 N1 H1A 102(2) . . ? 
C1 N1 H1B 108(2) . . ? 
Pd1 N1 H1B 102(2) . . ? 
H1A N1 H1B 111(3) . . ? 
C2 C1 C6 118.0(2) . . ? 
C2 C1 N1 120.6(3) . . ? 
C6 C1 N1 121.3(2) . . ? 
F1 C2 C3 119.8(3) . . ? 
F1 C2 C1 117.6(2) . . ? 
C3 C2 C1 122.6(3) . . ? 
C2 C3 C4 119.1(3) . . ? 
C2 C3 H3 116.7(19) . . ? 
C4 C3 H3 124.1(19) . . ? 
C5 C4 C3 118.5(3) . . ? 
C5 C4 H4 120(2) . . ? 
C3 C4 H4 121(2) . . ? 
F2 C5 C6 118.6(3) . . ? 
F2 C5 C4 118.6(3) . . ? 
C6 C5 C4 122.9(3) . . ? 
C5 C6 C1 118.9(3) . . ? 
C5 C6 H6 120.3(16) . . ? 
C1 C6 H6 120.7(16) . . ? 
 
loop_ 
 _geom_hbond_atom_site_label_D 
 _geom_hbond_atom_site_label_H 
 _geom_hbond_atom_site_label_A 
 _geom_hbond_distance_DH 
 _geom_hbond_distance_HA 
 _geom_hbond_distance_DA 
 _geom_hbond_angle_DHA 
 _geom_hbond_site_symmetry_A 
N1 H1B Cl1  0.82(3) 2.65(3) 3.367(3) 147(3) 2_544 
N1 H1B F1  0.82(3) 2.60(3) 2.990(3) 111(2) 4_565 
N1 H1A Cl1  0.75(3) 2.61(3) 3.362(3) 176(2) 2_554 
 
_diffrn_measured_fraction_theta_max    0.997 
_diffrn_reflns_theta_full              32.49 
_diffrn_measured_fraction_theta_full   0.997 
_refine_diff_density_max    1.266 
_refine_diff_density_min   -0.414 
_refine_diff_density_rms    0.112 
